# Supplementary material
Source: MDPI journal article supplement (https://www.mdpi.com/2073-4352/13/1/63)
Supplement: s1 [file s1]

## Supplementary Materials

**Supplementary Table S1.** Hydrogen bonds of NS5 dimer with  $\geq 100\%$  occupancy.

| Donor       | Acceptor    | Occupancy |
|-------------|-------------|-----------|
| ARG391-Side | ASP494-Side | 285.43%   |
| ARG673-Side | ASP671-Side | 281.79%   |
| ARG594-Side | ASP596-Side | 273.51%   |
| ARG364-Side | ASP544-Side | 243.38%   |
| ARG438-Side | GLU486-Side | 232.78%   |
| ARG815-Side | GLU807-Side | 231.13%   |
| ARG722-Side | ASP720-Side | 225.83%   |
| ARG391-Side | GLU397-Side | 223.18%   |
| ARG598-Side | GLU549-Side | 213.58%   |
| ARG352-Side | GLU67-Side  | 180.13%   |
| ARG76-Side  | ASP141-Side | 179.80%   |
| ARG395-Side | GLU428-Side | 170.20%   |
| SER210-Side | GLU216-Side | 160.60%   |
| ARG654-Side | GLU625-Side | 159.60%   |
| LYS180-Side | GLU216-Side | 151.32%   |
| TYR530-Side | ASP672-Side | 150.66%   |
| TYR299-Side | ASP590-Side | 148.01%   |
| ALA680-Main | GLU623-Side | 146.69%   |
| THR394-Side | GLU397-Side | 146.36%   |
| LYS180-Side | ASP146-Side | 145.03%   |
| TYR218-Main | VAL205-Main | 143.71%   |
| THR8-Side   | GLU11-Side  | 143.05%   |
| THR39-Side  | ASP37-Side  | 141.72%   |
| ARG76-Main  | ASP141-Side | 140.40%   |
| ARG282-Side | GLU414-Side | 140.40%   |
| VAL181-Main | MET217-Main | 136.75%   |
| ARG361-Side | ASP596-Side | 135.76%   |
| ARG262-Side | GLU267-Side | 133.77%   |
| THR828-Side | ASP826-Side | 133.77%   |
| ARG729-Side | GLU733-Side | 133.44%   |
| VAL205-Main | TYR218-Main | 133.11%   |
| THR542-Side | ASP545-Side | 133.11%   |
| ARG856-Side | ASP771-Side | 133.11%   |
| ARG581-Side | ASP294-Side | 132.78%   |
| ARG389-Side | ASP557-Side | 132.78%   |
| MET718-Main | ARG722-Main | 132.45%   |
| THR161-Side | GLU157-Main | 131.13%   |
| TRP219-Main | ILE179-Main | 131.13%   |
| SER781-Side | ASN777-Main | 130.46%   |
| ARG620-Side | SER697-Side | 129.47%   |
| SER235-Side | HSD215-Side | 129.47%   |
| LYS125-Main | VAL100-Main | 128.81%   |
| ARG370-Side | ASP544-Side | 127.48%   |

**Supplementary Table S1 (contd.).** Hydrogen bonds of NS5 dimer with  $\geq 100\%$  occupancy.

| Donor       | Acceptor    | Occupancy |
|-------------|-------------|-----------|
| ARG769-Side | ASP844-Side | 127.15%   |
| THR542-Main | ASP545-Side | 126.49%   |
| ILE592-Main | VAL577-Main | 126.49%   |
| LEU716-Main | LEU724-Main | 125.83%   |
| THR301-Side | ASP359-Side | 125.50%   |
| THR328-Side | VAL324-Main | 125.17%   |
| ARG871-Side | ASP881-Side | 124.17%   |
| MET589-Main | TYR308-Main | 124.17%   |
| VAL577-Main | ILE592-Main | 122.85%   |
| TYR304-Side | SER307-Side | 122.19%   |
| TYR218-Side | ASP146-Side | 121.85%   |
| ARG519-Side | GLU715-Side | 121.85%   |
| THR301-Main | ASP359-Side | 121.52%   |
| THR610-Side | TYR606-Main | 121.19%   |
| ARG436-Side | GLU439-Side | 121.19%   |
| ARG101-Side | GLU99-Side  | 120.86%   |
| ARG84-Side  | GLU111-Side | 117.22%   |
| THR399-Side | ARG395-Main | 115.56%   |
| THR394-Main | GLU397-Side | 114.90%   |
| TYR90-Side  | GLN63-Side  | 114.24%   |
| ARG361-Side | GLU269-Side | 113.25%   |
| ARG101-Main | VAL77-Main  | 112.58%   |
| THR649-Side | GLN645-Main | 112.25%   |
| LYS300-Side | ASP359-Side | 111.92%   |
| GLU486-Main | TYR482-Main | 111.26%   |
| ASP79-Main  | ARG101-Main | 111.26%   |
| ARG47-Side  | GLU49-Side  | 110.93%   |
| ARG206-Side | THR214-Main | 110.60%   |
| ASN321-Main | ARG739-Main | 110.26%   |
| TYR482-Side | GLU486-Side | 109.93%   |
| TYR89-Side  | VAL114-Main | 108.94%   |
| ALA528-Main | ASP672-Side | 108.28%   |
| TYR572-Side | GLU484-Side | 107.95%   |
| ASN609-Main | THR605-Main | 107.95%   |
| VAL830-Main | ASN814-Side | 107.62%   |
| LYS15-Side  | GLU7-Side   | 107.28%   |
| SER593-Side | HSD305-Side | 106.95%   |
| THR8-Main   | GLU11-Side  | 106.95%   |
| LYS719-Side | ASP835-Side | 106.29%   |
| ILE591-Main | GLY306-Main | 104.97%   |
| LEU257-Main | HSD52-Main  | 104.30%   |
| LEU193-Main | VAL189-Main | 104.30%   |
| ILE162-Main | GLU158-Main | 103.97%   |
| GLU648-Main | THR644-Main | 103.64%   |
| LEU679-Main | GLU623-Side | 103.31%   |

**Supplementary Table S1 (contd.).** Hydrogen bonds of NS5 dimer with  $\geq 100\%$  occupancy.

| Donor       | Acceptor    | Occupancy |
|-------------|-------------|-----------|
| ILE78-Main  | THR142-Main | 101.66%   |
| TYR89-Main  | GLY85-Main  | 101.66%   |
| ARG206-Side | GLU216-Main | 101.66%   |
| THR376-Side | VAL372-Main | 100.66%   |
| ARG262-Main | ASN122-Side | 100.66%   |
| LEU17-Main  | TRP13-Main  | 100.66%   |
| VAL667-Main | TYR530-Main | 100.33%   |
| LEU144-Main | ILE78-Main  | 100.33%   |
